# Supplementary material
Source: publisher site journal article supplement (https://www.dovepress.com/article/170706)
Supplement: Supplementary file 1 [file get_supplementary_file.php]

## **Supplementary data**

### **Appendix 1 Forest plot for efficacy at each cutoff value (Figure S1-S10)**

#### **1.1 Forest plot for rate of treatment success at each cutoff value without control**

**(Figure S1-S3)**

#### **1.2 Forest plot for rate of treatment success at each cutoff value with control**

**(Figure S4)**

#### **1.3 Forest plot for rate of prophylaxis failure at each cutoff value without**

**control (Figure S5-S7)**

#### **1.4 Forest plot for rate of prophylaxis failure at each cutoff value with control**

**(Figure S8-S10)**

### **Appendix 2 Sensitivity analysis on each study's effect on the summary estimates for efficacy (Table S1-S2)**

## Appendix 1 Forest plot for efficacy at each cutoff value (Figure S1-S10)

### Appendix 1.1 Forest plot for rate of treatment success at each cutoff value without control (Figure S1-S3)

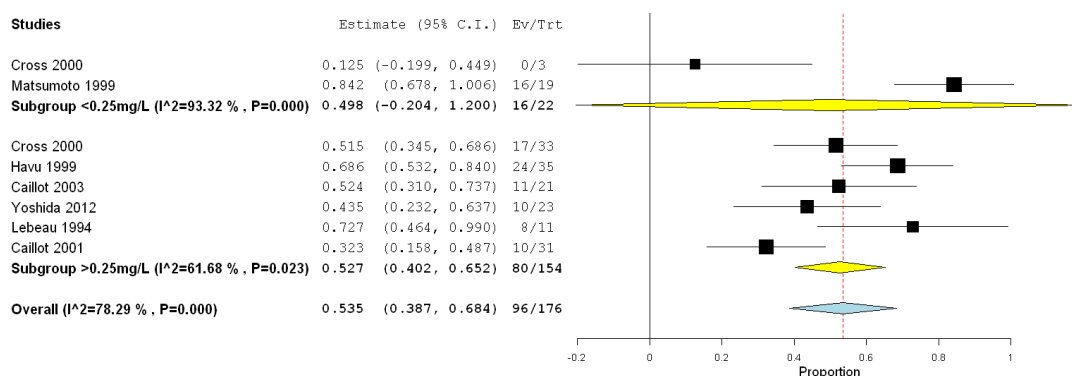

**Figure S1 Meta-analysis for rate of treatment success (trough concentration of <0.25 mg/L comparison with ≥0.25 mg/L)**

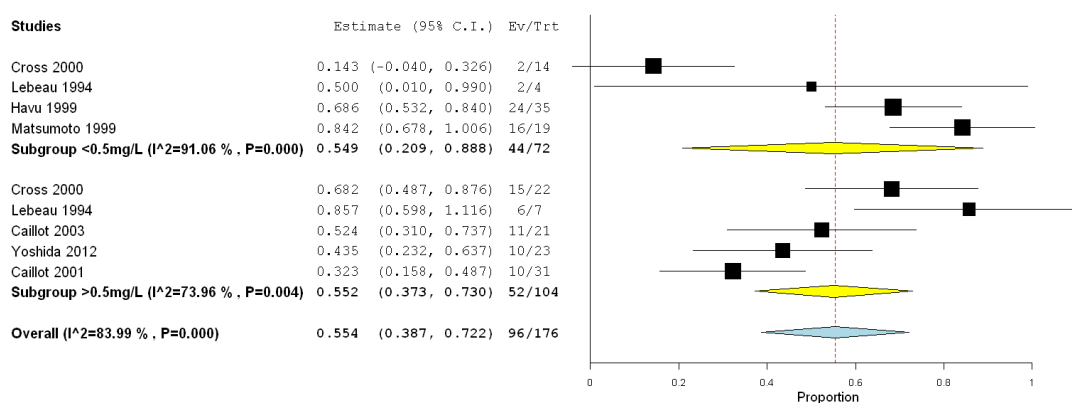

**Figure S2 Meta-analysis for rate of treatment success (trough concentration of <0.5 mg/L comparison with ≥0.5 mg/L)**

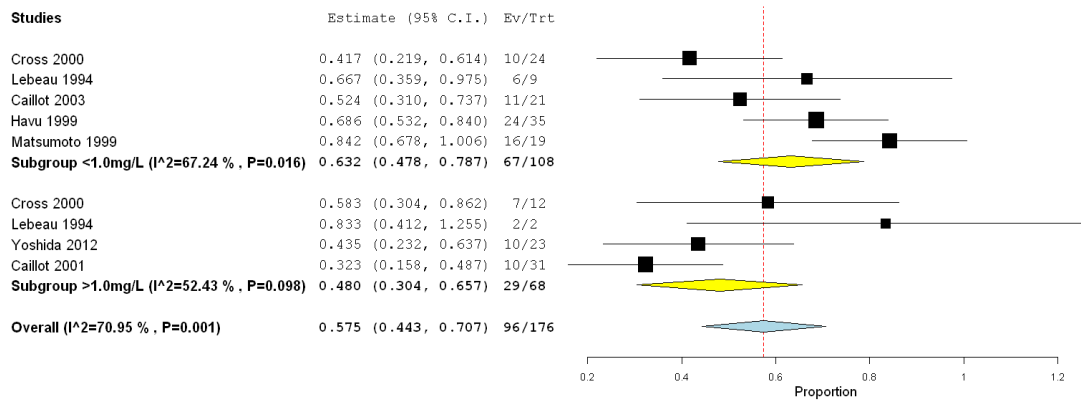

**Figure S3 Meta-analysis for rate of treatment success (trough concentration of <1.0 mg/L comparison with ≥1.0 mg/L)**

**Appendix 1.2 Forest plot for rate of treatment success at each cutoff value with control (Figure S4)**

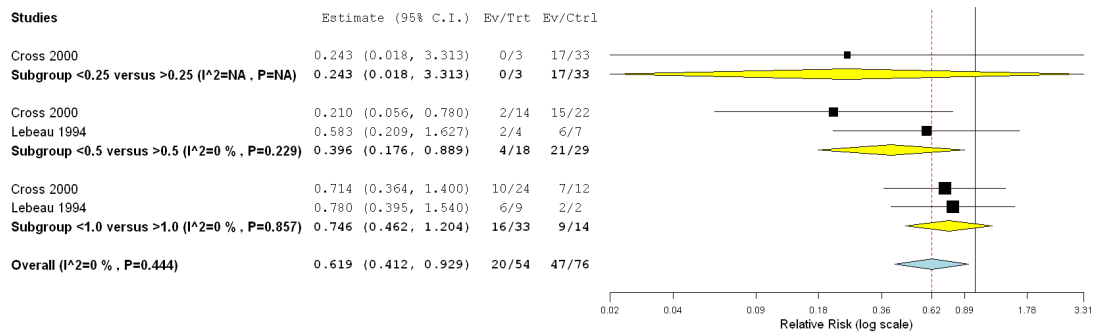

**Figure S4 Meta-analysis for rate of treatment success (trough concentration of <cut-off value comparison with  $\geq$ cut-off value, RR <1 favours  $C_{\text{trough}} \geq$ cut-off value)**

### Appendix 1.3 Forest plot for rate of prophylaxis failure at each cutoff value without control (Figure S5-S7)

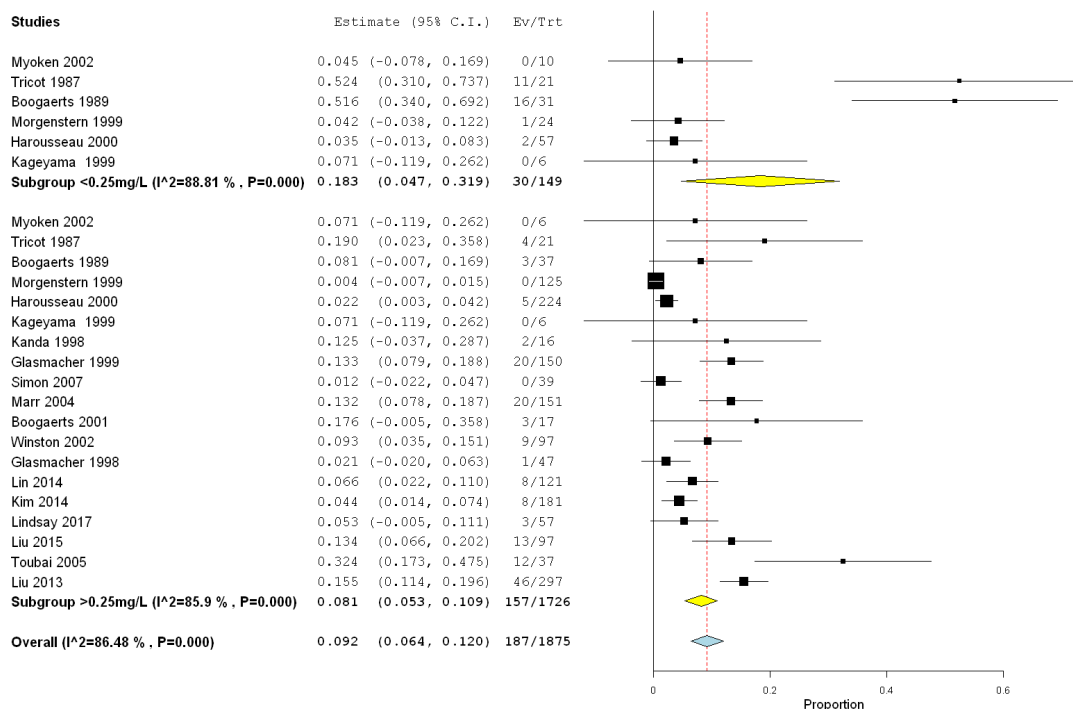

**Figure S5 Meta-analysis for rate of prophylaxis failure (trough concentration of <0.25 mg/L comparison with  $\geq 0.25$  mg/L)**

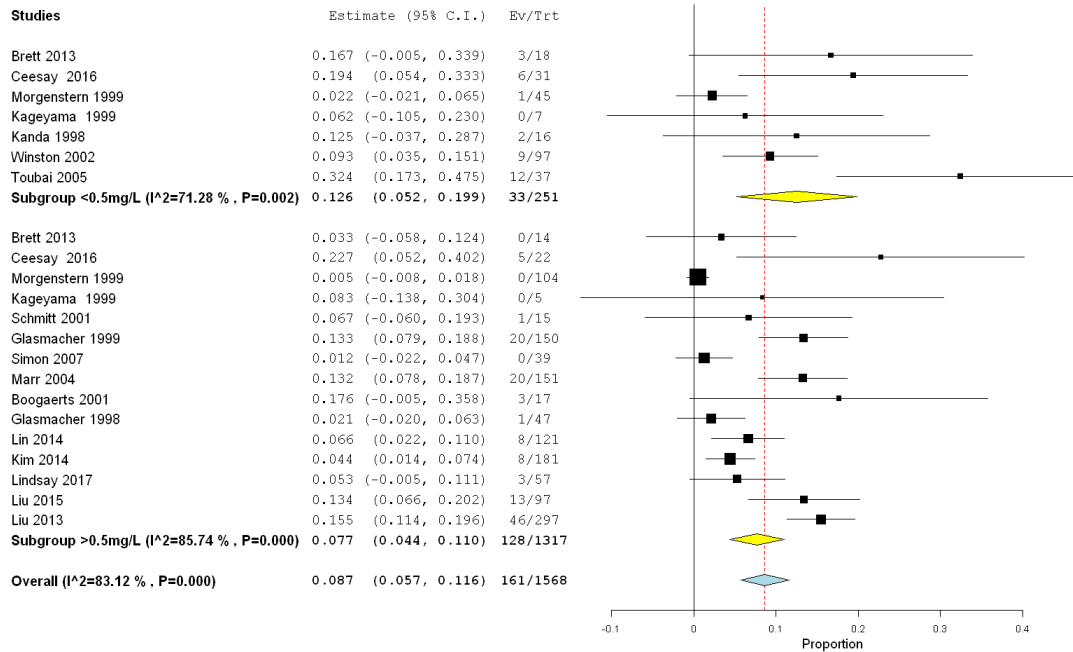

**Figure S6 Meta-analysis for rate of prophylaxis failure (trough concentration of <0.5 mg/L comparison with ≥0.5 mg/L)**

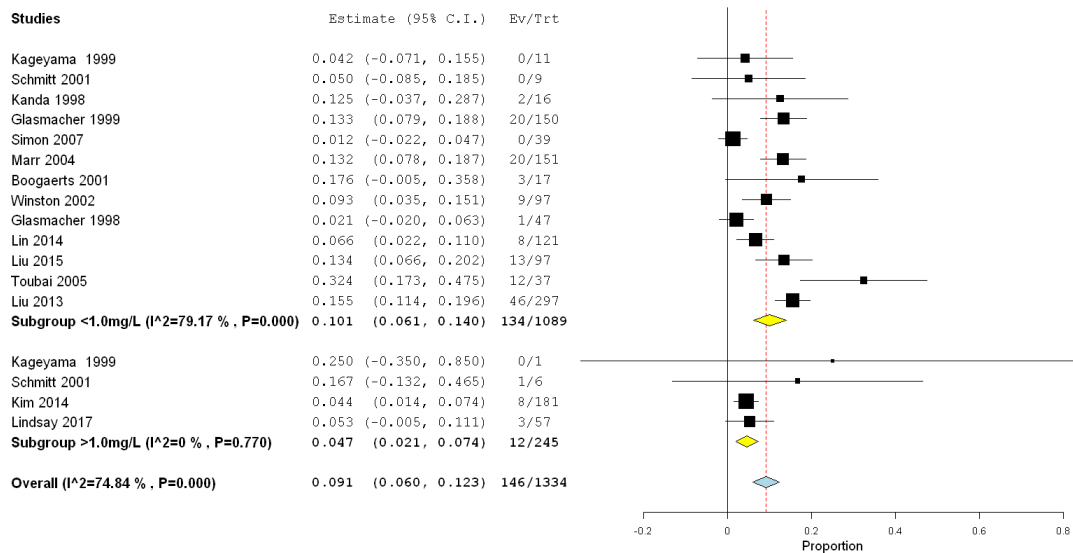

**Figure S7 Meta-analysis for rate of prophylaxis failure (trough concentration of <1.0 mg/L comparison with ≥1.0 mg/L)**

## Appendix 1.4 Forest plot for rate of prophylaxis failure at each cutoff value with control (Figure S8-S10)

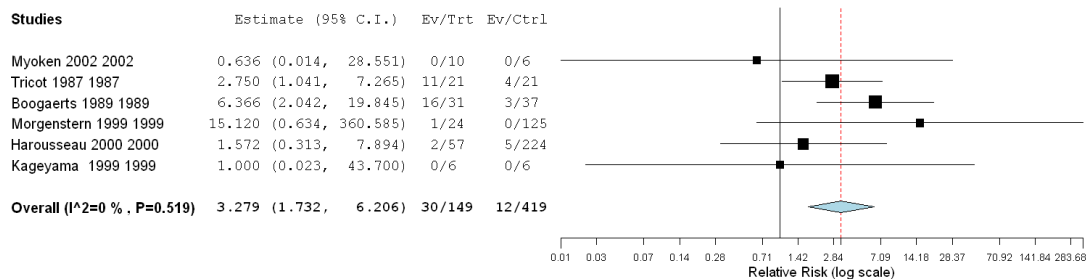

**Figure S8 Meta-analysis for rate of prophylaxis failure (trough concentration of <0.25 mg/L comparison with ≥0.25 mg/L, RR <1 favours C<sub>trough</sub> <0.25 mg/L)**

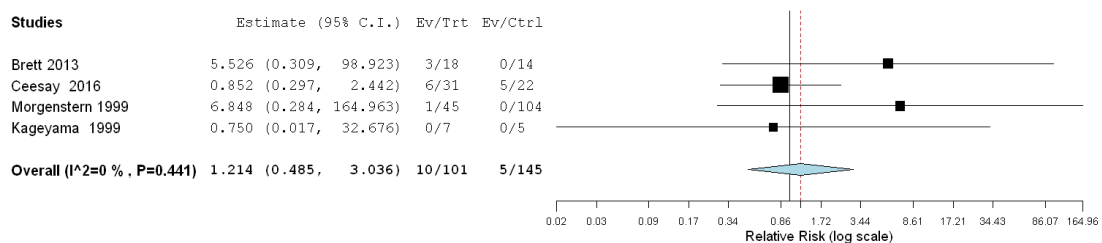

**Figure S9 Meta-analysis for rate of prophylaxis failure (trough concentration of <0.5 mg/L comparison with ≥0.5 mg/L, RR <1 favours C<sub>trough</sub> <0.5 mg/L)**

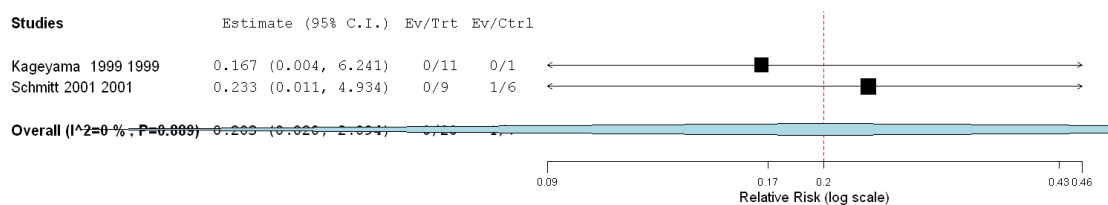

**Figure S10 Meta-analysis for rate of prophylaxis failure (trough concentration of <1.0 mg/L comparison with ≥1.0 mg/L, RR <1 favours C<sub>trough</sub> <1.0 mg/L)**

**Appendix 2 Sensitivity analysis on each study's effect on the summary estimates for efficacy (Table S1-S2)**

**Table S1 Sensitivity analysis on each study's effect on the summary estimates for efficacy (results were only reported when differing from primary analysis)**

| Cut off value             | Rate of treatment success |                                                          |                      |         | Incidence of IFI     |                                                          |                     |         |
|---------------------------|---------------------------|----------------------------------------------------------|----------------------|---------|----------------------|----------------------------------------------------------|---------------------|---------|
|                           | Sensitivity analysis      | No. of studies attributing data for sensitivity analysis | Primary analysis     | $I^2\%$ | Sensitivity analysis | No. of studies attributing data for sensitivity analysis | Primary analysis    | $I^2\%$ |
| < 0.25                    | NA                        | 1                                                        | 0.498(-0.204, 1.200) | 93.32   | -                    | 5                                                        | 0.183(0.047, 0.319) | 88.81   |
| $\geq$ 0.25               | <sup>a</sup>              | 5                                                        | 0.527(0.402, 0.652)  | 61.68   | -                    | 18                                                       | 0.081(0.053, 0.109) | 85.9    |
| < 0.5                     | -                         | 3                                                        | 0.549(0.209, 0.888)  | 91.06   | <sup>c</sup>         | 6                                                        | 0.126(0.052, 0.199) | 71.28   |
| $\geq$ 0.5                | -                         | 4                                                        | 0.552(0.373, 0.730)  | 73.96   | -                    | 14                                                       | 0.077(0.044, 0.110) | 85.74   |
| < 1.0                     | -                         | 4                                                        | 0.632(0.478, 0.787)  | 67.24   | -                    | 12                                                       | 0.101(0.061, 0.140) | 79.17   |
| $\geq$ 1.0                | <sup>b</sup>              | 3                                                        | 0.480(0.304, 0.657)  | 52.43   | NA                   | 3                                                        | 0.047(0.021, 0.074) | 0       |
| < 0.25 versus $\geq$ 0.25 | NA                        | 0                                                        | 0.243(0.018, 3.313)  | NA      | NA                   | 5                                                        | 3.279(1.732, 6.206) | 0       |
| < 0.5 versus $\geq$ 0.5   | NA                        | 1                                                        | 0.396(0.176, 0.889)  | 0       | NA                   | 3                                                        | 1.214(0.485, 3.306) | 0       |
| < 1.0 versus $\geq$ 1.0   | NA                        | 1                                                        | 0.746(0.462, 1.204)  | 0       | NA                   | 1                                                        | 0.203(0.026, 2.034) | 0       |

IFI=invasive fungal infection; -=no meaningful difference; NA=not application

<sup>abc</sup>,  $I^2$  decreased significantly after removing study



**Table S2. Summary of sensitivity analyses after removing studies**

| Cut-off value (mg/L)             | Remove study | RR (95% CI)         | No. of studies | No. of participants in experimental group | No. of participants in control group | <i>I</i> <sup>2</sup> % | <i>P</i> |
|----------------------------------|--------------|---------------------|----------------|-------------------------------------------|--------------------------------------|-------------------------|----------|
| <b>Rate of treatment success</b> |              |                     |                |                                           |                                      |                         |          |
| ≥0.25 <sup>a</sup>               | Caillot 2001 | 0.575(0.470,0.679)  | 5              |                                           |                                      | 31.13                   | 0.214    |
| ≥1.0 <sup>b</sup>                | Caillot 2001 | 0.556(0.358, 0.755) | 3              |                                           |                                      | 32.79                   | 0.226    |
| <b>Incidence of IFI</b>          |              |                     |                |                                           |                                      |                         |          |
| <0.5 <sup>c</sup>                | Toubai 2005  | 0.088(0.031, 0.145) | 6              |                                           |                                      | 49.01                   | 0.081    |
